# Supplementary material for: Polarizability-Dependent Sorting of Microparticles Using Continuous-Flow Dielectrophoretic Chromatography with a Frequency Modulation Method
Source: Micromachines (Basel). 2019 Dec 28;11(1):38. doi: 10.3390/mi11010038 (PMC7019690; doi:10.3390/mi11010038)
Supplement: Supplementary file 1 [file micromachines-11-00038-s001.zip]

Archive with 4 entries (4 files):
- micromachines-650056-supplementary materials.pdf
- S1_10um_100Vpp_PIVdata.mp4
- S2_DPC_0vpp_3vs6um.mp4
- S3_DPC_80vpp_3vs6um.mp4
